# Supplementary material for: Prediction of Suitable Habitat Distribution of Cryptosphaeria pullmanensis in the World and China under Climate Change
Source: MDPI journal article supplement (doi:10.3390/jof9070739), 2023-07-11
Supplement: s1 [file s1]

**Table S2. Environmental variables for current period model analysis**

| Type          | Code             | Description                                                                                                                            | Unit    |
|---------------|------------------|----------------------------------------------------------------------------------------------------------------------------------------|---------|
| Climate       | bio1             | Annual mean temperature                                                                                                                | °C      |
|               | bio2             | Mean diurnal range (Mean of monthly (max.temp.-min.temp.))                                                                             | °C      |
|               | bio3             | Isothermality (bio2 / bio7) ( $\times 100$ )                                                                                           |         |
|               | bio4             | Temperature seasonality (standard deviation*100)                                                                                       |         |
|               | bio5             | Max temperature of the warmest month                                                                                                   | °C      |
|               | bio6             | Min temperature of the coldest month                                                                                                   | °C      |
|               | bio7             | Temperature annual range (bio5- bio6)                                                                                                  | °C      |
|               | bio8             | Mean temperature of the wettest quarter                                                                                                | °C      |
|               | bio9             | Mean temperature of the driest quarter                                                                                                 | °C      |
|               | bio10            | Mean temperature of the warmest quarter                                                                                                | °C      |
|               | bio11            | Mean temperature of the coldest quarter                                                                                                | °C      |
|               | bio12            | Annual precipitation                                                                                                                   | mm      |
|               | bio13            | Precipitation of the wettest month                                                                                                     | mm      |
|               | bio14            | Precipitation of the driest month                                                                                                      | mm      |
|               | bio15            | Precipitation seasonality (Coefficient of variation)                                                                                   |         |
|               | bio16            | Precipitation of the wettest quarter                                                                                                   | mm      |
|               | bio17            | Precipitation of the driest quarter                                                                                                    | mm      |
|               | bio18            | Precipitation of the warmest quarter                                                                                                   | mm      |
|               | bio19            | Precipitation of coldest quarter                                                                                                       | mm      |
| Soil          | t-ph             | Topsoil pH (H <sub>2</sub> O)                                                                                                          |         |
|               | t-clay           | Topsoil clay fraction                                                                                                                  | %       |
|               | t-teb            | Topsoil TEB                                                                                                                            | cmol/kg |
|               | t-oc             | Topsoil organic carbon                                                                                                                 |         |
|               | t-ecce           | Topsoil electric conductivity                                                                                                          |         |
|               | t-esp            | Topsoil Sodicity (ESP-exchangeable sodium percentage)                                                                                  | %       |
|               | t-gravel         | Topsoil gravel content                                                                                                                 | %       |
|               | t-sand           | Topsoil sand fraction                                                                                                                  | %       |
|               | t-silt           | Topsoil silt fraction                                                                                                                  | %       |
|               | t-texture        | Topsoil soil texture                                                                                                                   |         |
|               | t-usda-tex-class | Topsoil USDA texture classification                                                                                                    |         |
| Land cover    | gm-lc-v3         | Land Cover Types (Cropland, Forest, Grassland, Shrubland, Wetland, Water, Tundra, Impervious Surface, Bare Land, Snow/Ice - Disturbed) |         |
|               | elev             | Elevation                                                                                                                              | m       |
| Topographical | slope            |                                                                                                                                        | °       |
|               | aspect           |                                                                                                                                        | rad     |
