# Supplementary material for: Prediction of Suitable Habitat Distribution of Cryptosphaeria pullmanensis in the World and China under Climate Change
Source: MDPI journal article supplement (doi:10.3390/jof9070739), 2023-07-11
Supplement: s1 [file s1]

**Table S1. Geographical distributions of *C. pullmanensis* species sampled in this study.**

| <b>Species</b>                     | <b>Longitude (°E )</b> | <b>Latitude (°N)</b> |
|------------------------------------|------------------------|----------------------|
| <i>Cryptosphaeria pullmanensis</i> | 118.91352              | 42.26268             |
| <i>Cryptosphaeria pullmanensis</i> | 111.75026              | 40.82625             |
| <i>Cryptosphaeria pullmanensis</i> | 86.18149               | 41.73237             |
| <i>Cryptosphaeria pullmanensis</i> | 80.06517               | 40.37579             |
| <i>Cryptosphaeria pullmanensis</i> | 86.788199              | 44.40984             |
| <i>Cryptosphaeria pullmanensis</i> | 86.21026               | 44.29055             |
| <i>Cryptosphaeria pullmanensis</i> | 80.84732               | 40.50143             |
| <i>Cryptosphaeria pullmanensis</i> | 86.02782               | 44.30300             |
| <i>Cryptosphaeria pullmanensis</i> | 81.67472               | 36.85722             |
| <i>Cryptosphaeria pullmanensis</i> | 75.99888               | 39.46638             |
| <i>Cryptosphaeria pullmanensis</i> | 83.94250               | 44.54611             |
| <i>Cryptosphaeria pullmanensis</i> | 81.52083               | 36.87444             |
| <i>Cryptosphaeria pullmanensis</i> | 82.49777               | 43.79083             |
| <i>Cryptosphaeria pullmanensis</i> | 83.14083               | 43.80611             |
| <i>Cryptosphaeria pullmanensis</i> | 80.26722               | 41.32055             |
| <i>Cryptosphaeria pullmanensis</i> | 80.23666               | 41.30166             |
| <i>Cryptosphaeria pullmanensis</i> | 80.45888               | 40.65166             |
| <i>Cryptosphaeria pullmanensis</i> | 82.68777               | 37.07805             |
| <i>Cryptosphaeria pullmanensis</i> | 76.91222               | 39.15361             |
| <i>Cryptosphaeria pullmanensis</i> | 80.35000               | 37.63833             |
| <i>Cryptosphaeria pullmanensis</i> | 82.788823              | 41.227749            |
| <i>Cryptosphaeria pullmanensis</i> | 82.955854              | 41.718278            |
| <i>Cryptosphaeria pullmanensis</i> | 79.40213               | 40.07555             |
| <i>Cryptosphaeria pullmanensis</i> | 81.30865               | 40.54907             |
| <i>Cryptosphaeria pullmanensis</i> | 80.59472               | 40.61166             |
| <i>Cryptosphaeria pullmanensis</i> | 80.45888               | 40.65166             |
| <i>Cryptosphaeria pullmanensis</i> | 81.56576               | 40.62759             |

|                                    |            |           |
|------------------------------------|------------|-----------|
| <i>Cryptosphaeria pullmanensis</i> | 81.85299   | 40.57433  |
| <i>Cryptosphaeria pullmanensis</i> | 81.36733   | 40.63154  |
| <i>Cryptosphaeria pullmanensis</i> | 86.54833   | 41.92944  |
| <i>Cryptosphaeria pullmanensis</i> | 86.953829  | 40.892112 |
| <i>Cryptosphaeria pullmanensis</i> | 86.11555   | 40.84527  |
| <i>Cryptosphaeria pullmanensis</i> | 93.8875    | 42.87944  |
| <i>Cryptosphaeria pullmanensis</i> | 52.8063    | 29.8763   |
| <i>Cryptosphaeria pullmanensis</i> | 52.151095  | 29.672723 |
| <i>Cryptosphaeria pullmanensis</i> | 53.6667    | 30.3333   |
| <i>Cryptosphaeria pullmanensis</i> | 52.6885    | 30.89258  |
| <i>Cryptosphaeria pullmanensis</i> | -122.8473  | 38.5111   |
| <i>Cryptosphaeria pullmanensis</i> | -121.9164  | 38.2219   |
| <i>Cryptosphaeria pullmanensis</i> | -120.7679  | 37.1642   |
| <i>Cryptosphaeria pullmanensis</i> | -116.0372  | 33.722    |
| <i>Cryptosphaeria pullmanensis</i> | -121.9059  | 38.7185   |
| <i>Cryptosphaeria pullmanensis</i> | -121.2774  | 37.937    |
| <i>Cryptosphaeria pullmanensis</i> | -120.809   | 39.354    |
| <i>Cryptosphaeria pullmanensis</i> | -122.8473  | 38.5111   |
| <i>Cryptosphaeria pullmanensis</i> | -121.0501  | 37.5501   |
| <i>Cryptosphaeria pullmanensis</i> | 48.484467  | 36.674339 |
| <i>Cryptosphaeria pullmanensis</i> | 51.680374  | 32.661343 |
| <i>Cryptosphaeria pullmanensis</i> | 51.587524  | 30.668383 |
| <i>Cryptosphaeria pullmanensis</i> | 80.256854  | 41.164822 |
| <i>Cryptosphaeria pullmanensis</i> | 75.977464  | 39.480041 |
| <i>Cryptosphaeria pullmanensis</i> | 88.3048    | 43.363422 |
| <i>Cryptosphaeria pullmanensis</i> | 93.510432  | 42.885913 |
| <i>Cryptosphaeria pullmanensis</i> | 89.588055  | 44.036744 |
| <i>Cryptosphaeria pullmanensis</i> | 76.166152  | 39.735495 |
| <i>Cryptosphaeria pullmanensis</i> | -120.63451 | 46.416520 |
| <i>Cryptosphaeria pullmanensis</i> | -119.86781 | 46.13319  |

|                                    |           |           |
|------------------------------------|-----------|-----------|
| <i>Cryptosphaeria pullmanensis</i> | 45.068333 | 37.549444 |
| <i>Cryptosphaeria pullmanensis</i> | 44.768611 | 38.196944 |
| <i>Cryptosphaeria pullmanensis</i> | 38.550556 | 38.550025 |
| <i>Cryptosphaeria pullmanensis</i> | 45.721944 | 36.765278 |
| <i>Cryptosphaeria pullmanensis</i> | 46.211111 | 36.521389 |
| <i>Cryptosphaeria pullmanensis</i> | 47.111667 | 36.400833 |
| <i>Cryptosphaeria pullmanensis</i> | 45.387778 | 36.955556 |
| <i>Cryptosphaeria pullmanensis</i> | 45.480000 | 36.155278 |
| <i>Cryptosphaeria pullmanensis</i> | 46.099444 | 36.969444 |
| <i>Cryptosphaeria pullmanensis</i> | 45.140300 | 36.6995   |
| <i>Cryptosphaeria pullmanensis</i> | -117.1739 | 46.7304   |
| <i>Cryptosphaeria pullmanensis</i> | 51.581944 | 30.668056 |
| <i>Cryptosphaeria pullmanensis</i> | 54.444444 | 31.584167 |
| <i>Cryptosphaeria pullmanensis</i> | 56.414444 | 29.466667 |
| <i>Cryptosphaeria pullmanensis</i> | 56.476667 | 29.067778 |
| <i>Cryptosphaeria pullmanensis</i> | 56.571667 | 29.928333 |
| <i>Cryptosphaeria pullmanensis</i> | 56.914167 | 29.290833 |
| <i>Cryptosphaeria pullmanensis</i> | 56.813333 | 30.770556 |

---
