# Supplementary material for: Prediction of Suitable Habitat Distribution of Cryptosphaeria pullmanensis in the World and China under Climate Change
Source: MDPI journal article supplement (doi:10.3390/jof9070739), 2023-07-11
Supplement: s1 [file s1]

**Table S7. The proportion of suitable areas for growing different grades of *C. pullmanensis* in China.**

| Scenario | Period          | High suitable area                        |            | Medium suitable area                      |            | Low suitable area                         |            | Total suitable area                       |            |
|----------|-----------------|-------------------------------------------|------------|-------------------------------------------|------------|-------------------------------------------|------------|-------------------------------------------|------------|
|          |                 | Area (×10 <sup>4</sup> /km <sup>2</sup> ) | Change (%) | Area (×10 <sup>4</sup> /km <sup>2</sup> ) | Change (%) | Area (×10 <sup>4</sup> /km <sup>2</sup> ) | Change (%) | Area (×10 <sup>4</sup> /km <sup>2</sup> ) | Change (%) |
| Current  | 1970-2000       | 24.96                                     |            | 43.89                                     |            | 99.07                                     |            | 167.92                                    |            |
|          | 2021-2040/2030s | 30                                        | 20.19      | 34.77                                     | -20.78     | 74.47                                     | -24.83     | 139.24                                    | -17.08     |
| SSP126   | 2041-2060/2050s | 37.55                                     | 50.44      | 33.89                                     | -22.78     | 109.12                                    | 10.14      | 180.56                                    | 7.53       |
|          | 2061-2080/2070s | 35.2                                      | 41.03      | 49.59                                     | 12.99      | 98.87                                     | -0.20      | 183.66                                    | 9.37       |
|          | 2081-2100/2090s | 29.21                                     | 17.03      | 44.48                                     | 1.34       | 107.24                                    | 8.25       | 180.93                                    | 7.75       |
|          | 2021-2040/2030s | 26.69                                     | 6.93       | 38.69                                     | -11.85     | 91.95                                     | -7.19      | 157.33                                    | -6.31      |
| SSP370   | 2041-2060/2050s | 32.12                                     | 28.69      | 39.7                                      | -9.55      | 113.42                                    | 14.48      | 185.24                                    | 10.31      |
|          | 2061-2080/2070s | 28.92                                     | 15.87      | 53.34                                     | 21.53      | 121.99                                    | 23.14      | 204.25                                    | 21.64      |
|          | 2081-2100/2090s | 30.6                                      | 22.60      | 47.42                                     | 8.04       | 97.8                                      | -1.28      | 175.82                                    | 4.70       |
|          | 2021-2040/2030s | 44.51                                     | 78.33      | 37.76                                     | -13.97     | 120.4                                     | 21.53      | 202.67                                    | 20.69      |
| SSP585   | 2041-2060/2050s | 29.27                                     | 17.27      | 46.65                                     | 6.29       | 112.66                                    | 13.72      | 188.58                                    | 12.30      |
|          | 2061-2080/2070s | 43.41                                     | 73.92      | 35.55                                     | -19.00     | 101.12                                    | 1.82       | 180.08                                    | 7.24       |
|          | 2081-2100/2090s | 20.55                                     | -17.67     | 54.06                                     | 23.17      | 80.95                                     | -18.29     | 155.56                                    | -7.36      |
