# Supplementary material for: Prediction of Suitable Habitat Distribution of Cryptosphaeria pullmanensis in the World and China under Climate Change
Source: MDPI journal article supplement (doi:10.3390/jof9070739), 2023-07-11
Supplement: s1 [file s1]

**Table S6. The proportion of suitable areas for growing different grades of *C. pullmanensis* around world**

| Scenario | Period          | High suitable area                        |            | Medium suitable area                      |            | Low suitable area                         |            | Total suitable area                       |            |
|----------|-----------------|-------------------------------------------|------------|-------------------------------------------|------------|-------------------------------------------|------------|-------------------------------------------|------------|
|          |                 | Area (×10 <sup>6</sup> /km <sup>2</sup> ) | Change (%) | Area (×10 <sup>6</sup> /km <sup>2</sup> ) | Change (%) | Area (×10 <sup>6</sup> /km <sup>2</sup> ) | Change (%) | Area (×10 <sup>6</sup> /km <sup>2</sup> ) | Change (%) |
| Current  | 1970-2000       | 0.59                                      |            | 1.42                                      |            | 3.37                                      |            | 5.38                                      |            |
|          | 2021-2040/2030s | 0.61                                      | 3.39       | 1.05                                      | -26.06     | 2.7                                       | -19.88     | 4.36                                      | -18.96     |
| SSP126   | 2041-2060/2050s | 0.64                                      | 8.47       | 1.16                                      | -18.31     | 3.13                                      | -7.12      | 4.93                                      | -8.36      |
|          | 2061-2080/2070s | 0.63                                      | 6.78       | 1.28                                      | -9.86      | 3.23                                      | -4.15      | 5.14                                      | -4.46      |
|          | 2081-2100/2090s | 0.61                                      | 3.39       | 1.12                                      | -21.13     | 3.12                                      | -7.42      | 4.85                                      | -9.85      |
|          | 2021-2040/2030s | 0.51                                      | -13.56     | 1.11                                      | -21.83     | 3.03                                      | -10.09     | 4.65                                      | -13.57     |
| SSP370   | 2041-2060/2050s | 0.53                                      | -10.17     | 1.03                                      | -27.46     | 2.83                                      | -16.02     | 4.39                                      | -18.40     |
|          | 2061-2080/2070s | 0.48                                      | -18.64     | 1.12                                      | -21.13     | 3.14                                      | -6.82      | 4.74                                      | -11.90     |
|          | 2081-2100/2090s | 0.45                                      | -23.73     | 1.04                                      | -26.76     | 2.47                                      | -26.71     | 3.96                                      | -26.39     |
|          | 2021-2040/2030s | 0.68                                      | 15.25      | 1.1                                       | -22.54     | 3.39                                      | 0.59       | 5.17                                      | -3.90      |
| SSP585   | 2041-2060/2050s | 0.52                                      | -11.86     | 1.09                                      | -23.24     | 3.06                                      | -9.20      | 4.67                                      | -13.20     |
|          | 2061-2080/2070s | 0.61                                      | 3.39       | 0.95                                      | -33.10     | 2.8                                       | -18.63     | 4.36                                      | -18.96     |
|          | 2081-2100/2090s | 0.29                                      | -50.85     | 1.05                                      | -26.06     | 1.05                                      | -68.84     | 2.39                                      | -55.58     |
