# Supplementary material for: Prediction of Suitable Habitat Distribution of Cryptosphaeria pullmanensis in the World and China under Climate Change
Source: MDPI journal article supplement (doi:10.3390/jof9070739), 2023-07-11
Supplement: s1 [file s1]

**Table S4. The relevant parameters for the best model generated by kuenm.**

| <b>Settings</b> | <b>RM</b> | <b>FC</b> | <b>Trian. AUC</b> | <b>avg.test.AUC</b> | <b>AICc</b> | <b>delta.AICc</b> |
|-----------------|-----------|-----------|-------------------|---------------------|-------------|-------------------|
| 1.1_LQPT        | 1.1       | LQPT      | 0.9904            | 0.978               | 1529.055    | 0                 |
