# Supplementary material for: Prediction of Suitable Habitat Distribution of Cryptosphaeria pullmanensis in the World and China under Climate Change
Source: MDPI journal article supplement (doi:10.3390/jof9070739), 2023-07-11
Supplement: s1 [file s1]

**Table S5. Percent contribution and permutation importance of 11 variables**

| <b>Code</b> | <b>Percent contribution</b> | <b>Permutation importance</b> |
|-------------|-----------------------------|-------------------------------|
| bio1        | 35.4                        | 31.7                          |
| bio18       | 29.4                        | 18.3                          |
| bio14       | 15.3                        | 42.6                          |
| gm_lc_v3    | 6                           | 0.4                           |
| elev        | 5.4                         | 0.4                           |
| t-silt      | 3.1                         | 3.4                           |
| t-teb       | 2                           | 0.1                           |
| t-ece       | 1.1                         | 0                             |
| t-grave     | 1                           | 1.7                           |
| aspect      | 0.8                         | 0.6                           |
| slope       | 0.5                         | 0.8                           |
