# Supplementary material for: Prediction of Suitable Habitat Distribution of Cryptosphaeria pullmanensis in the World and China under Climate Change
Source: MDPI journal article supplement (doi:10.3390/jof9070739), 2023-07-11
Supplement: s1 [file s1]

**Table S3. The environmental variables used in this study**

| Type          | Code     | Description                                                                                                                          | Unit    |
|---------------|----------|--------------------------------------------------------------------------------------------------------------------------------------|---------|
| Climate       | bio1     | Annual mean temperature                                                                                                              | °C      |
|               | Bio14    | Precipitation of driest month                                                                                                        | mm      |
|               | bio18    | Precipitation of the warmest quarter                                                                                                 | mm      |
| Soil          | t-silt   | Topsoil silt fraction                                                                                                                | %       |
|               | t-teb    | Topsoil TEB                                                                                                                          | cmol/kg |
|               | t-ece    | Topsoil electric conductivity                                                                                                        |         |
|               | t-grave  | Topsoil gravel content                                                                                                               | %       |
| Land cover    | gm-lc-v3 | Land Cover Types (Cropland, Forest, Grassland, Shrubland, Wetland, Water, Tundra, Impervious Surface, Bare Land, Snow/Ice-Disturbed) |         |
| Topographical | elev     | Elevation                                                                                                                            | m       |
|               | slope    | /                                                                                                                                    | °       |
|               | aspect   | /                                                                                                                                    | rad     |
