# Supplementary material for: Prediction of Suitable Habitat Distribution of Cryptosphaeria pullmanensis in the World and China under Climate Change
Source: MDPI journal article supplement (doi:10.3390/jof9070739), 2023-07-11
Supplement: s1 [file s1]

**Table S8. Percentage of distribution changes of *C. pullmanensis* between current and future climate-change scenarios in China**

| Scenario | Period        | Extended area                      | Shrink area                        | Stable area                        |
|----------|---------------|------------------------------------|------------------------------------|------------------------------------|
|          |               | Area ( $\times 10^4/\text{km}^2$ ) | Area ( $\times 10^4/\text{km}^2$ ) | Area ( $\times 10^4/\text{km}^2$ ) |
| SSP126   | Current-2030s | 8.72                               | 3.49                               | 37.94                              |
|          | Current-2050s | 12.97                              | 2.47                               | 38.96                              |
|          | Current-2070s | 13.92                              | 1.56                               | 39.88                              |
|          | Current-2090s | 9.27                               | 3.14                               | 38.29                              |
| SSP370   | Current-2030s | 8.69                               | 3.91                               | 37.52                              |
|          | Current-2050s | 11.64                              | 3.52                               | 37.92                              |
|          | Current-2070s | 15.2                               | 3.87                               | 37.56                              |
|          | Current-2090s | 18.39                              | 8.56                               | 32.88                              |
| SSP585   | Current-2030s | 17.48                              | 1.19                               | 40.24                              |
|          | Current-2050s | 13.72                              | 4.48                               | 36.96                              |
|          | Current-2070s | 19.7                               | 4.81                               | 36.63                              |
|          | Current-2090s | 16.52                              | 16.52                              | 24.92                              |
