# Supplementary figures and images for: Prediction of Suitable Habitat Distribution of Cryptosphaeria pullmanensis in the World and China under Climate Change
Source: MDPI journal article supplement (doi:10.3390/jof9070739), 2023-07-11

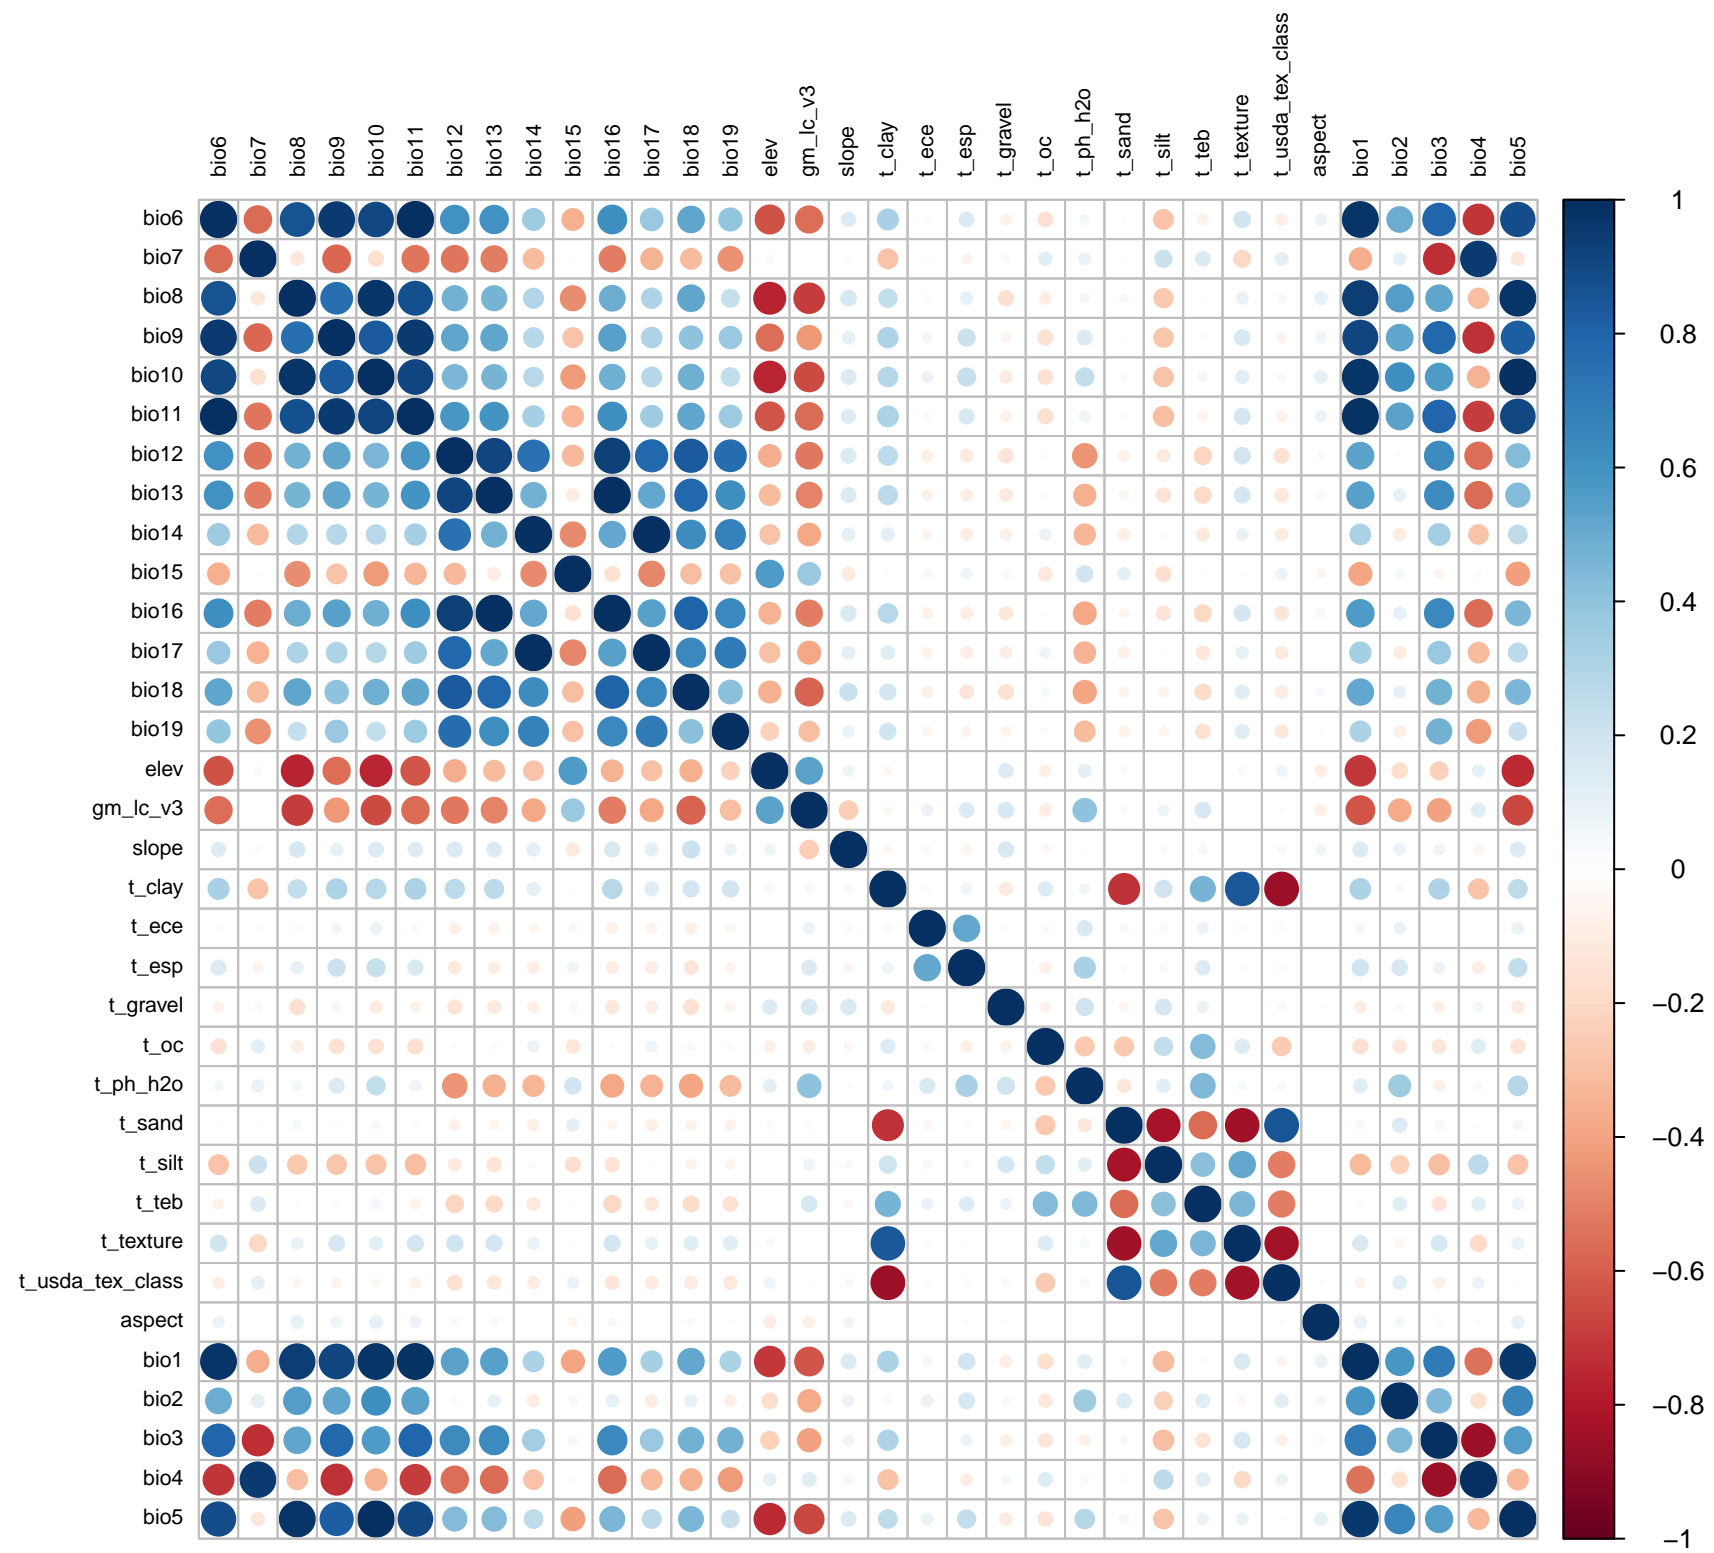

Supplement: s1 [file s1]
